# Supplementary material
Source: MDPI journal article supplement (https://www.mdpi.com/2073-4395/12/9/2056)
Supplement: s1 [file s1]

1 **Supplementary data**

2 **Table S1.** Climatic information in an upland field during two-year experimental duration.

|      | Sowing<br>time | Leaf<br>length<br>(cm) | ADT<br>-----<br>(°C) | DTR<br>-----<br>(°C) | ACT<br>-----<br>(hr) | ALP<br>(hr) | ADP<br>-----<br>(mol m <sup>-2</sup> ) | ACP<br>-----<br>(mol m <sup>-2</sup> ) | RH<br>(%) | Rainfall<br>(mm) |
|------|----------------|------------------------|----------------------|----------------------|----------------------|-------------|----------------------------------------|----------------------------------------|-----------|------------------|
| 2019 | Mar            | 10                     | 8.0                  | 15.0                 | 165.1                | 8.9         | 88                                     | 1854                                   | 57.7      | 21.6             |
|      |                | 15                     | 8.8                  | 14.4                 | 242.2                | 8.3         | 84                                     | 2352                                   | 60.4      | 41.1             |
|      |                | 18                     | 9.2                  | 15.1                 | 329.1                | 8.8         | 89                                     | 3193                                   | 57.2      | 41.5             |
|      | Apr            | 10                     | 11.9                 | 14.1                 | 286.4                | 9.4         | 103                                    | 2360                                   | 59.4      | 67.5             |
|      |                | 15                     | 13.1                 | 13.4                 | 380.0                | 8.7         | 97                                     | 2720                                   | 63.0      | 98.3             |
|      |                | 18                     | 13.9                 | 13.4                 | 486.0                | 8.8         | 98                                     | 3328                                   | 63.3      | 144.2            |
|      | May            | 10                     | 17.5                 | 11.3                 | 244.4                | 7.4         | 97                                     | 1263                                   | 73.1      | 32.2             |
|      |                | 15                     | 18.4                 | 12.1                 | 404.9                | 8.1         | 103                                    | 2154                                   | 70.5      | 33.4             |
|      |                | 18                     | 19.0                 | 12.1                 | 474.6                | 8.2         | 103                                    | 2476                                   | 71.1      | 33.4             |
|      | Jun            | 10                     | 23.0                 | 10.7                 | 298.5                | 7.0         | 98                                     | 1181                                   | 81.4      | 107.2            |
|      |                | 15                     | 23.0                 | 10.3                 | 391.2                | 6.7         | 94                                     | 1504                                   | 82.2      | 137.0            |
|      |                | 18                     | 23.2                 | 10.1                 | 463.0                | 6.6         | 92                                     | 1750                                   | 82.5      | 229.6            |
|      | Jul            | 10                     | 22.6                 | 6.6                  | 317.0                | 3.6         | 66                                     | 860                                    | 89.6      | 280.0            |
|      |                | 15                     | 22.8                 | 6.2                  | 388.1                | 3.3         | 61                                     | 980                                    | 84.2      | 427.2            |
|      |                | 18                     | 22.7                 | 6.0                  | 476.5                | 3.2         | 58                                     | 1167                                   | 83.9      | 483.1            |
|      | Aug            | 10                     | 27.0                 | 8.8                  | 432.6                | 7.1         | 86                                     | 1284                                   | 81.6      | 127.2            |
|      |                | 15                     | 25.4                 | 8.4                  | 609.1                | 6.2         | 75                                     | 1727                                   | 82.8      | 217.4            |
|      |                | 18                     | 23.9                 | 8.7                  | 810.9                | 5.9         | 71                                     | 2359                                   | 82.6      | 226.8            |
|      | Sep            | 10                     | 18.4                 | 11.9                 | 294.4                | 7.6         | 80                                     | 1203                                   | 73.2      | 0.2              |
|      |                | 15                     | 16.1                 | 12.8                 | 578.5                | 7.7         | 73                                     | 2562                                   | 69.7      | 28.6             |
|      |                | 18                     | 14.7                 | 13.2                 | 677.6                | 7.6         | 70                                     | 3129                                   | 70.1      | 30.9             |
|      | Oct            | 10                     | 9.7                  | 15.6                 | 214.0                | 7.8         | 58                                     | 1210                                   | 69.8      | 2.3              |
|      |                | 15                     | 8.8                  | 13.9                 | 328.3                | 7.0         | 52                                     | 2020                                   | 67.0      | 25.6             |
|      |                | 18                     | 5.0                  | 13.4                 | 328.3                | 7.0         | 49                                     | 3599                                   | 63.8      | 34.8             |

3 **Abbreviation** – ADT, average daily temperature; DTR, daily temperature range; ACT, accumulated temperature;

4 ALP, average light period; ADP, average daily photons; ACP, accumulated photons; RH, relative humidity.

5 **Table S1.** (Continued)

| Sowing time |     | Leaf length | ADT        | DTR   | ACT   | ALP                          | ADP   | ACP  | RH   | Rainfall |
|-------------|-----|-------------|------------|-------|-------|------------------------------|-------|------|------|----------|
|             |     | (cm)        | ----- (°C) | ----- | (hr)  | ----- (mol m <sup>-2</sup> ) | ----- | (%)  | (mm) |          |
| 2020        | Mar | 10          | 8.0        | 14.7  | 158.4 | 8.8                          | 88    | 1840 | 57.1 | 21.6     |
|             |     | 15          | 8.7        | 14.3  | 245.1 | 8.4                          | 84    | 2441 | 59.9 | 41.1     |
|             |     | 18          | 9.0        | 14.8  | 297.6 | 8.6                          | 87    | 2957 | 57.7 | 41.5     |
|             | May | 10          | 17.5       | 11.3  | 244.4 | 7.4                          | 97    | 1263 | 73.1 | 32.2     |
|             |     | 15          | 18.4       | 12.1  | 404.9 | 8.1                          | 103   | 2154 | 70.5 | 33.4     |
|             |     | 18          | 19.0       | 12.1  | 474.6 | 8.2                          | 103   | 2476 | 71.1 | 33.4     |
|             | Sep | 10          | 20.0       | 9.0   | 340.5 | 5.5                          | 61    | 968  | 82.9 | 172.3    |
|             |     | 15          | 19.0       | 10.1  | 454.8 | 6.6                          | 65    | 1505 | 78.7 | 172.3    |
|             |     | 18          | 18.2       | 10.4  | 563.4 | 6.5                          | 63    | 1890 | 79.3 | 182.1    |
|             | Oct | 10          | 7.2        | 13.6  | 208.9 | 6.7                          | 50    | 1596 | 68.3 | 48.2     |
|             |     | 15          | 6.6        | 14.0  | 221.5 | 6.9                          | 49    | 1924 | 67.7 | 48.2     |
|             |     | 18          | 6.4        | 13.9  | 241.3 | 6.9                          | 48    | 2132 | 67.5 | 48.2     |

6 **Abbreviation** – ADT, average daily temperature; DTR, daily temperature range; ACT, accumulated temperature;  
7 ALP, average light period; ADP, average daily photons; ACP, accumulated photons; RH, relative humidity.

10 **Table S2.** Correlation matrix of FW, leaf length, GI, GP, and climatic factors.

|             | Leaf<br>length | GI    | GP              | ADT             | DTR             | ACT             | ALP             | ADP             | ACP             | RH              | Rainfall        |
|-------------|----------------|-------|-----------------|-----------------|-----------------|-----------------|-----------------|-----------------|-----------------|-----------------|-----------------|
| FW          | <b>0.992**</b> | 0.002 | <b>0.563**</b>  | −0.004          | −0.028          | <b>0.593**</b>  | −0.045          | −0.092          | <b>0.625**</b>  | −0.021          | 0.196           |
| Leaf length | 1              | 0.030 | <b>0.529**</b>  | 0.001           | −0.036          | <b>0.581**</b>  | −0.056          | −0.084          | <b>0.608**</b>  | −0.030          | 0.215           |
| GI          |                | 1     | <b>−0.735**</b> | <b>0.802**</b>  | <b>−0.718**</b> | 0.190           | <b>−0.473**</b> | <b>0.382*</b>   | <b>−0.560**</b> | <b>0.685**</b>  | <b>0.563**</b>  |
| GP          |                |       | 1               | <b>−0.617**</b> | <b>0.450**</b>  | 0.131           | 0.195           | <b>−0.455**</b> | <b>0.763**</b>  | <b>−0.453**</b> | −0.278          |
| ADT         |                |       |                 | 1               | <b>−0.861**</b> | <b>0.584**</b>  | <b>−0.524**</b> | 0.263           | <b>−0.496**</b> | <b>0.861**</b>  | <b>0.605**</b>  |
| DTR         |                |       |                 |                 | 1               | <b>−0.465**</b> | <b>0.852**</b>  | 0.125           | <b>0.582**</b>  | <b>−0.916**</b> | <b>−0.849**</b> |
| ACT         |                |       |                 |                 |                 | 1               | −0.245          | 0.019           | 0.242           | <b>0.462**</b>  | <b>0.389*</b>   |
| ALP         |                |       |                 |                 |                 |                 | 1               | <b>−0.558**</b> | <b>0.595**</b>  | <b>−0.816**</b> | <b>−0.834**</b> |
| ADP         |                |       |                 |                 |                 |                 |                 | 1               | 0.170           | −0.197          | −0.256          |
| ACP         |                |       |                 |                 |                 |                 |                 |                 | 1               | <b>−0.660**</b> | <b>−0.406*</b>  |
| RH          |                |       |                 |                 |                 |                 |                 |                 |                 | 1               | <b>0.695**</b>  |

11 **Abbreviation** – FW, fresh weight; GI, growth index; GP, growth period; ADT, average daily temperature; DTR, daily temperature range; ACT,  
12 accumulated temperature; ALP, average light period; ADP, average daily photons; ACP, accumulated photons; RH, relative humidity.  
13 \*, \*\* Correlation is significant at the 0.05 and 0.01 level, respectively.

**Table S3.** Loading values of the plant parameters of saponarin, FW, leaf length, GI, GP, and climatic factors.

| Parameter   | PC 1   | PC 2   |
|-------------|--------|--------|
| Saponarin   | 0.553  | −0.697 |
| FW          | −0.048 | 0.962  |
| Leaf length | −0.061 | 0.951  |
| GI          | −0.809 | −0.165 |
| GP          | 0.545  | 0.690  |
| ADT         | −0.894 | −0.052 |
| DTR         | 0.973  | −0.021 |
| ACT         | −0.461 | 0.647  |
| ALP         | 0.824  | −0.061 |
| ADP         | 0.072  | −0.205 |
| ACP         | 0.633  | 0.690  |
| RH          | −0.942 | −0.041 |
| Rainfall    | −0.838 | 0.188  |

**Abbreviation** – FW, fresh weight; GI, growth index; GP, growth period; ADT, average daily temperature; DTR, daily temperature range; ACT, accumulated temperature; ALP, average light period; ADP, average daily photons; ACP, accumulated photons; RH, relative humidity.
